# Supplementary material
Source: publisher site journal article supplement (https://www.dovepress.com/article/422515)
Supplement: Supplementary file 1 [file get_supplementary_file.php]

**Table S1** Key hyper-parameters of the ML models.

| Male | | |
| --- | --- | --- |
| Model | Hyper-parameter | value |
| RF | max_depth | 2 |
|  | n_estimators | 45 |
| XGBoost | max_depth | 8 |
|  | n_estimators | 10 |
|  | subsample | 0.8 |
|  | learning_rate | 0.01 |
| LR | C (penalty coefficient) | 1 |
| SVM | C (penalty coefficient) | 1 |
|  | gamma | 0.07 |
| KNN | neighbors | 8 |
| DT | max_depth | 3 |
|  | min_samples_split | 2 |
|  | min_samples_leaf | 1 |
| Female | | |
| Model | Hyper-parameter | value |
| RF | max_depth | 3 |
|  | n_estimators | 25 |
| XGBoost | max_depth | 4 |
|  | n_estimators | 20 |
|  | subsample | 0.6 |
|  | learning_rate | 0.01 |
| LR | C (penalty coefficient) | 1 |
| SVM | C (penalty coefficient) | 1 |
|  | gamma | 0.07 |
| KNN | neighbors | 8 |
| DT | max_depth | 3 |
|  | min_samples_split | 2 |
|  | min_samples_leaf | 1 |

**Abbreviations:** RF, random forest; XGBoost, extreme gradient boost; LR, logistic regression; SVM, support vector machine; KNN, k-nearest neighbors; DT, decision tree.

**Table S2** Baseline characteristics of the male study population.

| **Variable** | **Training dataset (n=177)** | | | **Validation dataset (n=75)** | | |
| --- | --- | --- | --- | --- | --- | --- |
| **Decreased BMD Group**  **(n=** **114)** | **Normal BMD Group**  **(n=63)** | ***P* value** | **Decreased BMD Group**  **(n=41)** | **Normal BMD Group**  **(n=34)** | ***P* value** |
| Age (years) | 60.5 (55.0, 68.8) | 59.0 (53.5,65.5) | 0.107 | 60.0 (55.0,66.0) | 56.5 (52.3, 63.8) | 0.301 |
| Diabetes duration (months) | 120.0  (60.0,180.0) | 120.0  (36.0,180.0) | 0.912 | 60.0  (36.0,120.0) | 96.0  (24.0, 120.0) | 0.785 |
| Smoking, n (%) | 53.0 (46.5%) | 23.0 (36.5%) | 0.199 | 19.0 (46.3%) | 16.0 (47.1%) | 0.951 |
| Drinking, n (%) | 30.0 (26.3%) | 29.0 (46.0%) | **0.008** | 10.0 (24.4%) | 13.0 (38.2%) | 0.196 |
| SBP (mmHg) | 137.0 ± 17.9 | 135.1 ± 17.9 | 0.487 | 136.1 ± 16.1 | 133.5 ± 16.7 | 0.496 |
| DBP (mmHg) | 82.4 ± 10.8 | 82.8 ± 11.3 | 0.821 | 84.1±9.1 | 83.2 ± 11.7 | 0.709 |
| ALT (U/L) | 16.3 (11.7,22.5) | 19.5 (14.6,28.9) | **0.020** | 18.0 (12.8,25.5) | 17.7 (12.0, 27.5) | 0.790 |
| AST (U/L) | 16.9 (14.0,21.5) | 19.1 (16.2,22.9) | **0.011** | 18.0 (14.0,22.4) | 18.4 (15.2, 22.6) | 0.482 |
| TBIL (μmol/L) | 12.0 (8.2,15.8) | 12.6 (9.7,15.8) | 0.417 | 11.7 (9.4,15.6) | 11.8 (9.8, 15.7) | 0.911 |
| ALP (U/L) | 75.0 (61.0,91.8) | 68.0 (56.5,77.5) | **0.012** | 76.0 (64.0,91.0) | 69.0 (57.3, 81.8) | 0.099 |
| UA (μmol/L) | 283.4  (241.6,344.9) | 344.7  (297.9,384.6) | **<0.001** | 308.3  (272.0,353.0) | 354.0  (287.5, 407.5) | 0.068 |
| Ca (mmol/L) | 2.3 (2.2,2.3) | 2.3 (2.2,2.4) | 0.055 | 2.3 (2.2,2.3) | 2.3 (2.2, 2.4) | 0.638 |
| TC (mmol/L) | 4.4 (3.7,5.1) | 4.4 (3.9,5.1) | 0.786 | 4.4 ± 0.7 | 4.5 ± 0.9 | 0.408 |
| TG (mmol/L) | 1.5 (1.0,2.2) | 1.9 (1.2,2.6) | 0.150 | 1.5 (1.1,2.0) | 1.7 (1.2, 2.6) | 0.203 |

**Table S2** (continued)

| **Variable** | **Training dataset (n=177)** | | | **Validation dataset (n=75)** | | |
| --- | --- | --- | --- | --- | --- | --- |
| **Decreased BMD Group**  **(n=** **114)** | **Normal BMD Group**  **(n=63)** | ***P* value** | **Decreased BMD Group**  **(n=41)** | **Normal BMD Group**  **(n=34)** | ***P* value** |
| HDL (mmol/L) | 1.0 (0.9,1.2) | 1.0 (0.8,1.3) | 0.889 | 1.0 (0.9,1.2) | 1.0 (0.8, 1.1) | **0.016** |
| LDL (mmol/L) | 2.5 (2.1,3.2) | 2.5 (2.0,3.1) | 0.302 | 2.5 ± 0.6 | 2.5 ± 0.6 | 0.837 |
| TG/HDL | 1.5 (1.0,2.5) | 1.8 (0.9,3.0) | 0.302 | 1.5 (1.0,2.0) | 2.0 (1.1, 2.8) | **0.039** |
| FT3 (pmol/L) | 4.4 (4.2,4.9) | 4.5 (4.1,4.9) | 0.792 | 4.5 (4.2,4.9) | 4.4 (4.1, 4.9) | 0.561 |
| FT4 (pmol/L) | 16.9 (15.2,18.0) | 17.4 (15.9,18.7) | 0.088 | 17.5 (15.7,19.0) | 17.3 (16.0, 18.6) | 0.466 |
| TSH (μIU/ml) | 1.7 (1.1,2.3) | 2.2 (1.6,3.0) | **0.002** | 2.1 (1.3,2.7) | 2.0 (1.5, 2.4) | 0.705 |
| HbA1c (%) | 9.2 (7.6,11.1) | 8.3 (7.4,11.0) | 0.328 | 9.0 (7.5,10.8) | 8.6 (7.4, 10.7) | 0.807 |
| FCP (mmol/L) | 522.6  (349.6,662.2) | 543.5  (390.6,813.8) | 0.405 | 517.7  (433.3,760.9) | 516.1  (389.8, 751.3) | 0.812 |
| FPG (mmol/L) | 8.1 (6.5,10.4) | 8.2 (6.6,10.2) | 0.625 | 8.1 (6.3,9.7) | 8.3 (6.5, 10.4) | 0.729 |
| HOMA-IR | 3.1(2.4,3.7) | 3.2 (2.6,4.0) | 0.320 | 3.1(2.7,3.6) | 2.9 (2.6, 3.6) | 0.970 |
| HOMA-islet | 29.1 (17.0,48.9) | 33.5 (16.5,50.1) | 0.784 | 35.9 (20.8,57.8) | 35.8 (19.6, 50.9) | 0.852 |
| TyG index | 0.4 ± 0.4 | 0.5 ± 0.3 | 0.388 | 0.5(0.4,0.6) | 0.4 (0.2, 0.6) | 0.192 |
| PINP (ng/ml) | 35.3 (29.1,47.4) | 31.5 (22.7,40.6) | **0.021** | 39.2 (29.7,48.8) | 31.6 (26.6, 40.6) | 0.082 |
| CTX (pg/ml) | 398.6  (279.8,528.5) | 282.1  (220.2,379.2) | **<0.001** | 418.9  (348.4,584.4) | 298.2  (223.1, 455.1) | **0.036** |

**Table S2** (continued)

| **Variable** | **Training dataset (n=177)** | | | **Validation dataset (n=75)** | | |
| --- | --- | --- | --- | --- | --- | --- |
| **Decreased BMD Group**  **(n=** **114)** | **Normal BMD Group**  **(n=63)** | ***P* value** | **Decreased BMD Group**  **(n=41)** | **Normal BMD Group**  **(n=34)** | ***P* value** |
| PTH (pg/ml) | 37.1  (28.6,43.3) | 39.3  (26.5,47.3) | 0.545 | 40.7  (32.0,54.2) | 36.8  (27.4, 46.2) | 0.282 |
| eGFR (ml/min/1.73 min2) | 104.9  (87.8,113.9) | 99.4 (85.0,112.8) | 0.228 | 104.1  (89.1,112.7) | 103.7  (91.3, 115.7) | 0.983 |
| DN, n (%) | 30 (26.3%) | 18 (28.6%) | 0.747 | 10 (24.4%) | 6 (17.7%) | 0.478 |
| DR, n (%) | 20 (17.5%) | 14 (22.2%) | 0.449 | 7 (17.1%) | 8 (23.5%) | 0.487 |
| CVD, n (%) | 78(68.4%) | 40(63.5%) | 0.505 | 36(87.8%) | 14(41.2%) | **<0.001** |
| DPN, n (%) | 77(67.5%) | 35 (55.6%) | 0.113 | 27 (65.9%) | 18 (52.9%) | 0.256 |
| ASMI (kg/m2) | 7.3 ± 0.7 | 7.6 ± 0.7 | **0.008** | 7.4 (7.0,7.8) | 7.8 (7.5, 8.4) | **0.002** |
| BFM (kg) | 16.2 ± 5.7 | 18.8 ± 6.2 | **0.005** | 17.3 ± 4.8 | 19.5 ± 5.5 | 0.075 |
| FFM (kg) | 50.5 ± 6.1 | 53.4 ± 5.9 | **0.003** | 49.7  (47.4, 53.7) | 55.1  (50.4, 60.2) | **0.002** |
| SMM (kg) | 27.9 ± 3.6 | 29.6 ± 3.5 | **0.002** | 27.5  (25.9, 30.0) | 30.7  (27.9, 33.7) | **0.001** |
| BMI (kg/m2) | 23.1 (20.9,25.1) | 24.3 (22.6,26.3) | **0.008** | 23.6 ± 2.4 | 25.3 ± 3.2 | **0.011** |
| PBF (%) | 23.8 ± 6.0 | 25.5 ± 6.1 | 0.074 | 27.1  (21.8, 28.7) | 24.6  (21.8, 30.6) | 0.663 |
| WHR | 0.91 ± 0.06 | 0.94 ± 0.07 | **0.008** | 0.92 ± 0.05 | 0.94 ± 0.06 | 0.063 |
| FFMI (kg/m2) | 17.4 (16.4,18.8) | 17.8 (16.9,18.9) | 0.072 | 17.6 ± 1.3 | 18.7 ± 1.8 | **0.004** |
| FMI (kg/m2) | 5.6 ± 2.0 | 6.4 ± 2.1 | **0.024** | 6.0 ± 1.7 | 6.6 ± 2.0 | 0.140 |
| PhA | 5.2 (4.8,5.7) | 5.4 (4.9,5.8) | 0.456 | 5.2 (4.9, 5.7) | 5.4 (5.2, 6.0) | **0.036** |

**Notes:** Bold values represented a *P* value less than 0.05 with statistical significance.

**Abbreviations:** BMD, bone mineral density; SBP, systolic blood pressure; DBP, diastolic blood pressure; ALT, alanine transaminase; AST, aspartate aminotransferase; TBIL, total bilirubin; ALP: alkaline phosphatase; UA, uric acid; Ca, calcium; TC, total cholesterol; TG, triglyceride; HDL, high-density lipoprotein; LDL, low-density lipoprotein; FT3, free triiodothyronine; FT4, free thyroxine; TSH, thyroid stimulating hormone; HbA1c, glycated hemoglobin A1c; FCP, fasting C-peptide; FPG, fasting plasma glucose; HOMA-IR, homeostasis model assessment for insulin resistance; HOMA-islet, homeostasis model assessment for islet beta-cell function; TyG index, triglyceride-glucose index; PINP: N-terminal propeptide of type I procollagen; CTX:C-terminal telopeptide of type I collagen; PTH, parathyroid hormone; eGFR, estimated glomerular filtration rate; DN, diabetic nephropathy; DR, diabetic retinopathy; CVD, cardiovascular disease; DPN, diabetic peripheral neuropathy; ASMI: appendicular skeletal muscle mass index; BFM, body fat mass; FFM, fat-free mass; SMM, skeletal muscle mass; BMI, body mass index; PBF, percentage of body fat; WHR, waist-to-hip ratio; FFMI, fat-free mass index; FMI, fat mass index; PhA, phase angle

**Table S3** Baseline characteristics of the female study population.

| **Variable** | **Training dataset (n=139)** | | | **Validation dataset (n=59)** | | |
| --- | --- | --- | --- | --- | --- | --- |
| **Decreased BMD Group**  **(n=103)** | **Normal BMD Group**  **(n=36)** | ***P* value** | **Decreased BMD Group**  **(n=47)** | **Normal BMD Group**  **(n=12)** | ***P* value** |
| Age (years) | 66.0 (57.0, 73.0) | 55.5 (52.0, 58.8) | **<0.001** | 65.0 (60.0, 72.0) | 55.5 (52.3, 68.5) | **0.032** |
| Diabetes duration (months) | 120.0  (36.0, 204.0) | 78.0  (12.0, 156.0) | 0.251 | 72.0  (24.0, 120.0) | 90.0  (36.0, 174.0) | 0.519 |
| Drinking, n (%) | 2.0 (1.9%) | 0 (0.0%) | 0.400 | 1.0 (2.1%) | 0 (0.0%) | 0.610 |
| SBP (mmHg) | 138.0  (124.0, 149.0) | 142.0  (124.3, 152.0) | 0.475 | 144.1 ± 16.3 | 135.6 ± 15.6 | 0.111 |
| DBP (mmHg) | 78.0 (72.0, 85.0) | 83.5 (74.3, 89.8) | 0.099 | 81.5 ± 11.1 | 79.9 ± 8.5 | 0.650 |
| ALT (U/L) | 15.3 (11.2, 26.8) | 17.2 (14.6, 28.8) | 0.119 | 16.1 (11.9, 25.0) | 18.8 (15.3, 21.9) | 0.323 |
| AST (U/L) | 18.5 (15.8, 25.7) | 18.3 (15.2, 25.5) | 0.874 | 20.0 (16.8, 26.0) | 17.5 (16.0, 21.5) | 0.413 |
| TBIL (μmol/L) | 10.5 (8.4, 14.1) | 9.3 (7.8, 11.7) | 0.053 | 10.0 (8.3, 13.1 | 7.3 (6.5, 10.5) | **0.034** |
| ALP (U/L) | 84.0  (68.0, 100.0) | 75.0  (66.0, 89.0) | 0.067 | 85.1 ± 23.7 | 66.1 ± 16.7 | **0.011** |
| UA (μmol/L) | 293.3 ± 94.7 | 325.4 ± 100.4 | 0.087 | 297.7 ± 83.4 | 329.6 ± 70.6 | 0.229 |
| Ca (mmol/L) | 2.3 ± 0.1 | 2.3 ± 0.1 | **0.022** | 2.3 ± 0.1 | 2.4 ± 0.1 | 0.173 |
| TC (mmol/L) | 4.7 (4.0, 5.4) | 4.8 (4.1, 5.8) | 0.434 | 4.6 (4.1, 5.7) | 4.1 (3.7, 5.1) | 0.081 |
| TG (mmol/L) | 1.5 (1.1, 2.3) | 1.8 (1.4, 2.3) | 0.136 | 1.8 (1.1, 3.1) | 1.8 (1.5, 2.2) | 0.925 |

**Table S3** (continued)

| **Variable** | **Training set (n=139)** | | | **Validation set (n=59)** | | |
| --- | --- | --- | --- | --- | --- | --- |
| **Decreased BMD Group**  **(n=103)** | **Normal BMD Group**  **(n=36)** | ***P* value** | **Decreased BMD Group**  **(n=47)** | **Normal BMD Group**  **(n=12)** | ***P* value** |
| HDL (mmol/L) | 1.1 (1.0, 1.3) | 1.1 (0.9, 1.3) | 0.445 | 1.1 (0.9, 1.3) | 1.1 (0.9, 1.3) | 0.554 |
| LDL (mmol/L) | 2.7 (2.2, 3.5) | 2.8 (2.4, 3.4) | 0.634 | 2.6 (2.2, 3.1) | 2.3 (1.8, 3.1) | 0.220 |
| TG/HDL | 1.2 (0.9, 2.2) | 1.6 (1.2, 2.3) | 0.146 | 1.6 (0.8, 3.2) | 1.8 (1.3, 2.5) | 0.678 |
| FT3 (pmol/L) | 4.2 ± 0.5 | 4.1 ± 0.5 | 0.518 | 4.2 (3.9, 4.5) | 4.2 (3.8, 4.4) | 0.691 |
| FT4 (pmol/L) | 16.4 (15.3, 18.0) | 16.9 (15.7, 17.6) | 0.651 | 15.9 (14.9, 18.3) | 15.6 (14.0, 17.3) | 0.651 |
| TSH (μIU/ml) | 2.3 (1.4, 3.4) | 1.9 (1.3, 3.6) | 0.840 | 1.8 (1.4, 3.1) | 2.0 (1.3, 2.9) | 0.792 |
| HbA1c (%) | 9.0 (7.4, 11.1) | 9.9 (7.4, 10.5) | 0.939 | 9.4± 2.4 | 8.5 ± 1.8 | 0.191 |
| FCP (mmol/L) | 613.8  (403.3, 797.9) | 699.3  (508.1, 828.5) | 0.203 | 460.0  (351.8, 740.0) | 827.0  (652.8, 1028.8) | **0.003** |
| FPG (mmol/L) | 8.5 (6.7, 11.5) | 8,1 (6.4, 11.0) | 0.442 | 7.7 (6.3, 10.5) | 7.2 (5.9, 9.5) | 0.474 |
| HOMA-IR | 3.3 (2.6, 4.3) | 3.5 (2.9, 4.1) | 0.679 | 3.1 (2.4, 4.0) | 3.9 (2.8, 5.1) | 0.060 |
| HOMA-islet | 28.5 (18.1, 49.7) | 36.8 (21.0, 59.9) | 0.145 | 37.4 (19.0, 68.9) | 58.3 (44.3, 92.9) | **0.032** |
| TyG index | 0.7 ± 0.4 | 0.6 ± 0.3 | 0.458 | 0.5 (0.3, 0.8) | 0.7 (0.4, 0.9) | 0.244 |
| PINP (ng/ml) | 47.4 (31.6, 64.5) | 35.7 (24.2, 55.6) | **0.019** | 48.8 ± 19.5 | 37.4 ± 8.1 | 0.053 |
| CTX (pg/ml) | 474.1  (306.1, 683.5) | 316.5  (228.5, 557.8) | **0.012** | 450.7  (333.5, 729.2) | 360.7  (220.7, 508.4) | **0.033** |

| **Variable** | **Training dataset (n=139)** | | | **Validation dataset (n=59)** | | |
| --- | --- | --- | --- | --- | --- | --- |
| **Decreased BMD Group**  **(n=103)** | **Normal BMD Group**  **(n=36)** | ***P* value** | **Decreased BMD Group**  **(n=47)** | **Normal BMD Group**  **(n=12)** | ***P* value** |
| PTH (pg/ml) | 39.3 (29.0, 49.3) | 30.3 (24.7, 44.0) | 0.095 | 37.8 (31.7, 43.2) | 30.1 (26.1, 41.0) | 0.203 |
| eGFR (ml/min/1.73 min2) | 93.5  (80.9, 101.0) | 99.5  (87.2, 103.0) | 0.193 | 94.8  (87.9, 101.5) | 94.2  (81.5, 104.2) | 0.895 |
| DN, n (%) | 43.0 (41.7%) | 13.0 (36.1%) | 0.553 | 16.0 (34.0%) | 3.0 (25.0%) | 0.550 |
| DR, n (%) | 27.0 (26.2%) | 10.0 (27.8%) | 0.855 | 7.0 (14.9%) | 2.0 (16.7%) | 0.879 |
| CVD, n (%) | 66.0 (64.1%) | 15.0 (41.7%) | **0.019** | 32.0 (68.1%) | 7.0 (58.3%) | 0.524 |
| DPN, n (%) | 51.0 (49.5%) | 11.0 (30.6%) | **0.049** | 14.0 (29.8%) | 5.0 (41.7%) | 0.432 |
| ASMI (kg/m2) | 6.1 (5.7, 6.4) | 6.5 (5.9, 7.2) | **0.001** | 6.0 ± 0.5 | 6.5 ± 0.5 | **0.006** |
| ICW (kg) | 17.4 ± 1.8 | 19.1 ± 2.4 | **<0.001** | 17.0 ± 1.7 | 18.9 ± 2.0 | **0.001** |
| BFM (kg) | 19.0 (15.8, 23.8) | 23.1 (19.9, 28.6) | **0.001** | 19.8 ± 5.7 | 21.9 ± 4.8 | 0.252 |
| FFM (kg) | 38.8 ± 4.1 | 42.4 ± 5.5 | **<0.001** | 37.8 ± 3.6 | 42.1 ± 4.4 | **0.001** |
| SMM (kg) | 20.7 ± 2.4 | 23.0 ± 3.2 | **<0.001** | 20.2 ± 2.2 | 22.7 ± 2.6 | **0.001** |
| BMI (kg/m2) | 23.2 (21.1, 25.3) | 25.2 (23.1, 27.2) | **0.003** | 23.6 ± 2.7 | 24.8 ± 2.7 | 0.167 |
| PBF (%) | 33.5 ± 6.6 | 36.1 ± 5.1 | **0.034** | 34.2 (28.7, 37.1) | 33.3 (30.1, 38.8) | 1.000 |
| WHR | 0.92 ± 0.06 | 0.95 ± 0.06 | **0.003** | 0.91 ± 0.06 | 0.93 ± 0.05 | 0.540 |
| FFMI (kg/m2) | 15.4 (14.8, 16.0) | 16.2 (15.2, 17.2) | **0.009** | 15.5 ± 1.0 | 16.3 ± 1.3 | **0.012** |
| FMI (kg/m2) | 7.7 (6.2, 9.8) | 8.8 (7.6, 10.6) | **0.007** | 8.1 ± 2.3 | 8.5 ± 1.9 | 0.582 |
| PhA | 4.6 ± 0.5 | 4.8 ± 0.5 | **0.025** | 4.6 ± 0.5 | 4.8 ± 0.6 | 0.369 |

**Table S3** (continued)

**Notes:** Bold values represented a *P* value less than 0.05 with statistical significance.

**Abbreviations:** BMD, bone mineral density; SBP, systolic blood pressure; DBP, diastolic blood pressure; ALT, alanine transaminase; AST, aspartate aminotransferase; TBIL, total bilirubin; ALP: alkaline phosphatase; UA, uric acid; Ca, calcium; TC, total cholesterol; TG, triglyceride; HDL, high-density lipoprotein; LDL, low-density lipoprotein; FT3, free triiodothyronine; FT4, free thyroxine; TSH, thyroid stimulating hormone; HbA1c, glycated hemoglobin A1c; FCP, fasting C-peptide; FPG, fasting plasma glucose; HOMA-IR, homeostasis model assessment for insulin resistance; HOMA-islet, homeostasis model assessment for islet beta-cell function; TyG index, triglyceride-glucose index; PINP: N-terminal propeptide of type I procollagen; CTX:C-terminal telopeptide of type I collagen; PTH, parathyroid hormone; eGFR, estimated glomerular filtration rate; DN, diabetic nephropathy; DR, diabetic retinopathy; CVD, cardiovascular disease; DPN, diabetic peripheral neuropathy; ASMI: appendicular skeletal muscle mass index; ICW, intracellular water; BFM, body fat mass; FFM, fat-free mass; SMM, skeletal muscle mass; BMI, body mass index; PBF, percentage of body fat; WHR, waist-to-hip ratio; FFMI, fat-free mass index; FMI, fat mass index; PhA, phase angle

**Table S4** Univariate and multivariate analysis of factors associated with a BMD decrease in the male patients.

| **Variable** | **Univariate logistic regression** | | **Multivariate logistic regression** | |
| --- | --- | --- | --- | --- |
| **OR (95% CI)** | ***P* value** | **OR (95% CI)** | ***P* value** |
| Age | 1.032 (0.995, 1.073) | 0.097 |  |  |
| Diabetes duration | 1.000 (0.997, 1.004) | 0.872 |  |  |
| Smoking | 1.511 (0.808, 2.867) | 0.200 |  |  |
| Drinking | 0.419 (0.218, 0.798) | **0.008** | 0.357(0.171,0.745) | **0.006** |
| SBP | 1.006 (0.989, 1.024) | 0.485 |  |  |
| DBP | 0.997 (0.969, 1.025) | 0.820 |  |  |
| ALT | 0.987 (0.966, 1.008) | 0.217 |  |  |
| AST | 0.987 (0.959, 1.015) | 0.352 |  |  |
| TBIL | 0.989 (0.934, 1.048) | 0.692 |  |  |
| ALP | 1.022 (1.007, 1.040) | **0.009** | 1.028(1.008,1.049) | **0.007** |
| UA | 0.992 (0.988, 0.996) | **<0.001** | 0.992(0.988,0.996) | **<0.001** |
| Ca | 0.067 (0.004, 0.997) | 0.055 |  |  |
| TC | 1.020 (0.768, 1.363) | 0.891 |  |  |
| TG | 0.851 (0.677, 1.066) | 0.159 |  |  |
| HDL | 0.828 (0.258, 2.076) | 0.751 |  |  |
| LDL | 1.255 (0.952, 1.825) | 0.205 |  |  |
| TG/HDL | 0.917 (0.776, 1.077) | 0.288 |  |  |
| FT3 | 0.953 (0.591, 1.523) | 0.839 |  |  |
| FT4 | 0.920 (0.807, 1.045) | 0.200 |  |  |
| TSH | 0.831 (0.654, 1.029) | 0.103 |  |  |
| HbA1c | 1.059 (0.924, 1.220) | 0.414 |  |  |
| FCP | 1.000 (0.998, 1.001) | 0.426 |  |  |
| FPG | 0.967 (0.892, 1.049) | 0.411 |  |  |
| HOMA-IR | 0.898 (0.898, 0.682) | 0.443 |  |  |
| HOMA-islet | 0.997 (0.989, 1.006) | 0.525 |  |  |
| TyG index | 0.678 (0.277, 1.626) | 0.386 |  |  |
| PINP | 1.029 (1.006, 1.056) | **0.018** |  |  |
| CTX | 1.003 (1.001, 1.005) | **0.001** |  |  |

**Table S4** (continued)

| **Variable** | **Univariate logistic regression** | | **Multivariate logistic regression** | |
| --- | --- | --- | --- | --- |
| **OR (95% CI)** | ***P* value** | **OR (95% CI)** | ***P* value** |
| PTH | 0.994 (0.974, 1.015) | 0.556 |  |  |
| eGFR | 1.009 (0.993, 1.026) | 0.249 |  |  |
| DN | 0.893 (0.452, 1.796) | 0.747 |  |  |
| DR | 0.745 (0.348, 1.625) | 0.450 |  |  |
| CVD | 1.246 (0.648, 2.376) | 0.506 |  |  |
| DPN | 1.665 (0.883, 3.142) | 0.114 |  |  |
| ASMI | 0.533 (0.324, 0.848) | **0.010** | 0.534(0.309,0.922) | **0.024** |
| PFFM | 75.281 (0.533, 12722.702) | 0.091 |  |  |
| PSMM | 15.976 (0.011, 35779.225) | 0.466 |  |  |
| SMM | 0.874 (0.796, 0.954) | **0.003** |  |  |
| BMI | 0.872 (0.872, 0.778) | **0.013** |  |  |
| PBF | 0.954 (0.905, 1.004) | 0.076 |  |  |
| Inbody Score | 1.025 (0.973, 1.081) | 0.354 |  |  |
| BMR | 0.996 (0.994, 0.999) | **0.004** |  |  |
| WHR | 0.001 (0.000, 0.173) | **0.010** |  |  |
| TBW/FFM | 1.453 (0.449, 4.779) | 0.534 |  |  |
| FFMI | 0.825 (0.670, 1.008) | 0.064 |  |  |
| FMI | 0.839 (0.715, 0.977) | **0.026** |  |  |
| PhA | 0.846 (0.542, 1.309) | 0.454 |  |  |

**Notes:** Bold values represented a *P* value less than 0.05 with statistical significance.

**Abbreviations:** BMD, bone mineral density; OR, odds ratio; CI, confidence interval; SBP, systolic blood pressure; DBP, diastolic blood pressure; ALT, alanine transaminase; AST, aspartate aminotransferase; TBIL, total bilirubin; ALP: alkaline phosphatase; UA, uric acid; Ca, calcium; TC, total cholesterol; TG, triglyceride; HDL, high-density lipoprotein; LDL, low-density lipoprotein; FT3, free triiodothyronine; FT4, free thyroxine; TSH, thyroid stimulating hormone; HbA1c, glycated hemoglobin A1c; FCP, fasting C-peptide; FPG, fasting plasma glucose; HOMA-IR, homeostasis model assessment for insulin resistance; HOMA-islet, homeostasis model assessment for islet beta-cell function; TyG index, triglyceride-glucose index; PINP, N-terminal propeptide of type I procollagen; CTX, C-terminal telopeptide of type I collagen; PTH, parathyroid hormone; eGFR, estimated glomerular filtration rate; DN, diabetic nephropathy; DR, diabetic retinopathy; CVD, cardiovascular disease; DPN, diabetic peripheral neuropathy; ASMI, appendicular skeletal muscle mass index; PFFM, percentage of fat-free mass; PSMM, percentage of skeletal muscle mass; SMM, skeletal muscle mass; BMI, body mass index; PBF, percentage of body fat; BMR, basal metabolic rate; WHR, waist-to-hip ratio; FFMI, fat-free mass index; FMI, fat mass index; PhA, phase angle

**Table S5** Univariate and multivariate analysis of factors associated with a BMD decrease in the female patients.

| **Variable** | **Univariate logistic regression** | | **Multivariate logistic regression** | |
| --- | --- | --- | --- | --- |
| **OR (95% CI)** | ***P* value** | **OR (95% CI)** | ***P* value** |
| Age | 1.162 (1.087, 1.242) | **<0.001** | 1.216(1.111,1.331) | **<0.001** |
| Diabetes duration | 1.002 (0.998, 1.006) | 0.238 |  |  |
| SBP | 0.994 (0.975, 1.012) | 0.488 |  |  |
| DBP | 0.976 (0.944, 1.008) | 0.134 |  |  |
| ALT | 0.990 (0.972, 1.007) | 0.243 |  |  |
| AST | 0.994 (0.967, 1.023) | 0.693 |  |  |
| TBIL | 1.098 (0.992, 1.214) | 0.070 |  |  |
| ALP | 1.015 (0.999, 1.032) | 0.073 |  |  |
| UA | 0.997 (0.993, 1.001) | 0.091 |  |  |
| Ca | 0.026 (0.001, 0.627) | **0.025** | 0.026 (0.000,1.739) | 0.089 |
| TC | 0.843 (0.636, 1.117) | 0.234 |  |  |
| TG | 0.938 (0.825, 1.067) | 0.329 |  |  |
| HDL | 1.512 (0.395, 5.785) | 0.546 |  |  |
| LDL | 0.855 (0.569, 1.285) | 0.452 |  |  |
| TG/HDL | 0.985 (0.936, 1.036) | 0.553 |  |  |
| FT3 | 1.275 (0.613, 2.651) | 0.515 |  |  |
| FT4 | 0.986 (0.832, 1.168) | 0.869 |  |  |
| TSH | 0.939 (0.729, 1.210) | 0.628 |  |  |
| HbA1c | 1.000 (0.844, 1.186) | 0.997 |  |  |
| FCP | 0.999 (0.998, 1.000) | 0.225 |  |  |
| FPG | 1.072 (0.962, 1.195) | 0.206 |  |  |
| HOMA-IR | 1.049 (0.815, 1.349) | 0.711 |  |  |
| HOMA-islet | 0.993 (0.985, 1.002) | 0.117 |  |  |
| TyG index | 1.516 (0.509, 4.516) | 0.455 |  |  |
| PINP | 1.023 (1.003, 1.043) | **0.027** | 1.044 (1.014,1.075) | **0.003** |
| CTX | 1.002 (1.000, 1.004) | **0.031** |  |  |

**Table S5** (continued)

| **Variable** | **Univariate logistic regression** | | **Multivariate logistic regression** | |
| --- | --- | --- | --- | --- |
| **OR (95% CI)** | ***P* value** | **OR (95% CI)** | ***P* value** |
| PTH | 1.012 (0.986, 1.038) | 0.370 |  |  |
| eGFR | 0.992 (0.971, 1.014) | 0.476 |  |  |
| DN | 1.268 (0.578, 2.779) | 0.553 |  |  |
| DR | 0.924 (0.394, 2.164) | 0.855 |  |  |
| CVD | 2.497 (1.150, 5.422) | **0.021** |  |  |
| DPN | 2.229 (0.994, 4.998) | 0.052 |  |  |
| ASMI | 0.346 (0.190, 0.632) | **0.001** |  |  |
| PFFM | 750.153 (3.130, 179763.390) | **0.018** |  |  |
| PSMM | 85.089 (0.042, 174448.734) | 0.253 |  |  |
| ICW | 0.673 (0.550, 0.823) | **<0.001** | 0.497(0.320,0.771) | **0.002** |
| ECW | 0.578 (0.426, 0.783) | **<0.001** |  |  |
| BFM | 0.921 (0.873, 0.973) | **0.003** |  |  |
| BMI | 0.876 (0.793, 0.969) | **0.010** | 1.389(0.953,2.204) | 0.088 |
| PBF | 0.936 (0.879, 0.996) | **0.037** | 0.787(0.645,0.960) | **0.018** |
| Inbody Score | 1.041 (0.973, 1.113) | 0.242 |  |  |
| WHR | 0.000 (0.000, 0.061) | **0.005** |  |  |
| TBW/FFM | 1.283 (0.224, 7.336) | 0.779 |  |  |
| FFMI | 0.697 (0.529, 0.919) | **0.010** |  |  |
| PhA | 0.434 (0.206, 0.916) | **0.028** |  |  |

**Notes:** Bold values represented a *P* value less than 0.05 with statistical significance.

**Abbreviations:** BMD, bone mineral density; OR, odds ratio; CI, confidence interval; SBP, systolic blood pressure; DBP, diastolic blood pressure; ALT, alanine transaminase; AST, aspartate aminotransferase; TBIL, total bilirubin; ALP: alkaline phosphatase; UA, uric acid; Ca, calcium; TC, total cholesterol; TG, triglyceride; HDL, high-density lipoprotein; LDL, low-density lipoprotein; FT3, free triiodothyronine; FT4, free thyroxine; TSH, thyroid stimulating hormone; HbA1c, glycated hemoglobin A1c; FCP, fasting C-peptide; FPG, fasting plasma glucose; HOMA-IR, homeostasis model assessment for insulin resistance; HOMA-islet, homeostasis model assessment for islet beta-cell function; TyG index, triglyceride-glucose index; PINP, N-terminal propeptide of type I procollagen; CTX, C-terminal telopeptide of type I collagen; PTH, parathyroid hormone; eGFR, estimated glomerular filtration rate; DN, diabetic nephropathy; DR, diabetic retinopathy; CVD, cardiovascular disease; DPN, diabetic peripheral neuropathy; ASMI, appendicular skeletal muscle mass index; PFFM, percentage of fat-free mass; PSMM, percentage of skeletal muscle mass; ICW, intracellular water; ECW, extracellular water; BFM, body fat mass; BMI, body mass index; PBF, percentage of body fat; WHR, waist-to-hip ratio; FFMI, fat-free mass index; PhA, phase angle

**Table S6** The comparison of six machine learning models in the male patients.

| **Model** | **Training dataset** | | | | | **Testing dataset** | | | | |
| --- | --- | --- | --- | --- | --- | --- | --- | --- | --- | --- |
|  | **Accuracy** | **AUC** | **Recall** | **precision** | **F1-score** | **Accuracy** | **AUC** | **Recall** | **precision** | **F1-score** |
| LR | 0.69 | 0.75 | 0.82 | 0.71 | 0.76 | 0.72 | **0.87** | 0.81 | 0.79 | 0.76 |
| RF | 0.72 | 0.81 | 0.86 | 0.73 | 0.79 | 0.64 | 0.75 | 0.81 | 0.74 | 0.68 |
| XGBoost | **0.89** | **0.97** | 0.96 | **0.88** | **0.92** | 0.68 | 0.80 | 0.81 | 0.76 | 0.72 |
| SVM | 0.62 | 0.74 | **0.99** | 0.62 | 0.76 | 0.68 | **0.87** | **1.00** | 0.80 | 0.67 |
| DT | 0.74 | 0.81 | 0.74 | 0.82 | 0.78 | **0.80** | 0.75 | 0.81 | **0.84** | **0.87** |
| KNN | 0.76 | 0.81 | 0.76 | 0.83 | 0.79 | 0.72 | 0.80 | 0.75 | 0.77 | 0.80 |

**Notes:**Bold values represented the model with the best performance.

**Abbreviations:** AUC, area under the curve; LR, logistic regression; RF, random forest; XGBoost, extreme gradient boost; SVM, support vector machine; DT, decision tree; KNN, k-nearest neighbors.

**Table S7** The comparison of six machine learning models in the female patients.

| **Model** | **Training dataset** | | | | | **Testing dataset** | | | | |
| --- | --- | --- | --- | --- | --- | --- | --- | --- | --- | --- |
|  | **Accuracy** | **AUC** | **Recall** | **precision** | **F1-score** | **Accuracy** | **AUC** | **Recall** | **precision** | **F1-score** |
| LR | 0.85 | 0.87 | 0.93 | **0.88** | 0.90 | **0.85** | 0.87 | **1.00** | **0.90** | **0.82** |
| RF | 0.85 | **0.95** | **1.00** | 0.83 | 0.91 | 0.80 | 0.87 | **1.00** | 0.88 | 0.78 |
| XGBoost | **0.88** | **0.95** | 0.97 | **0.88** | **0.92** | **0.85** | **0.88** | **1.00** | **0.90** | **0.82** |
| SVM | 0.76 | 0.84 | **1.00** | 0.76 | 0.87 | 0.70 | 0.77 | **1.00** | 0.82 | 0.70 |
| DT | 0.87 | 0.88 | 0.99 | 0.86 | **0.92** | 0.80 | 0.85 | 0.93 | 0.87 | 0.81 |
| KNN | 0.83 | 0.85 | 0.91 | 0.87 | 0.89 | 0.70 | 0.60 | 0.93 | 0.81 | 0.72 |

**Notes:** Bold values represented the model with the best performance.

**Abbreviations:** Abbreviations: AUC, area under the curve; LR, logistic regression; RF, random forest; XGBoost, extreme gradient boost; SVM, support vector machine; DT, decision tree; KNN, k-nearest neighbors.


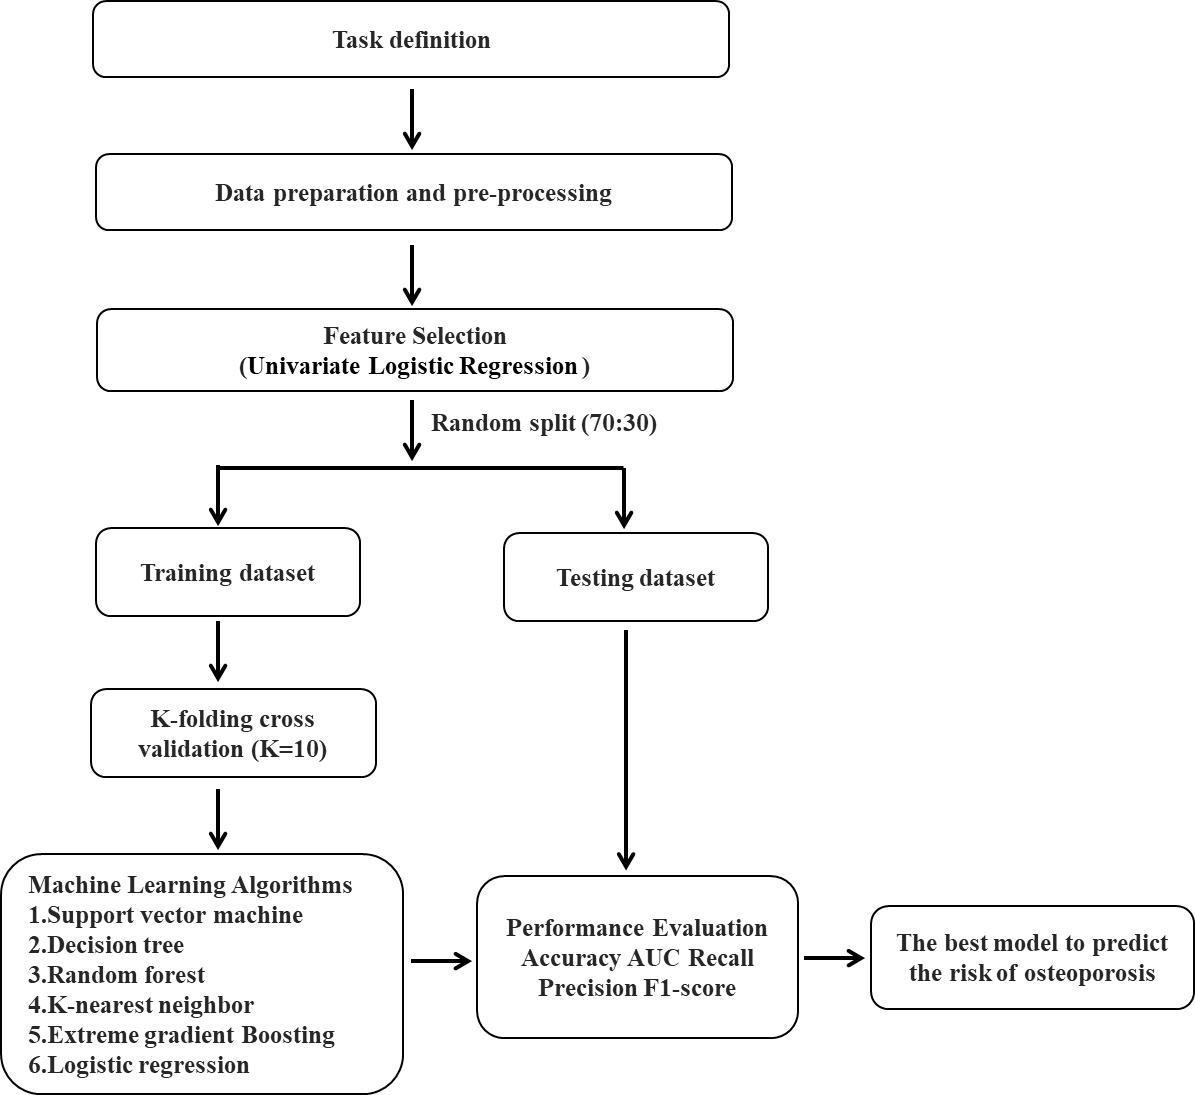


**Figure S1** The process of developing machine learning algorithms.

**Abbreviation:** AUC, area under the curve.


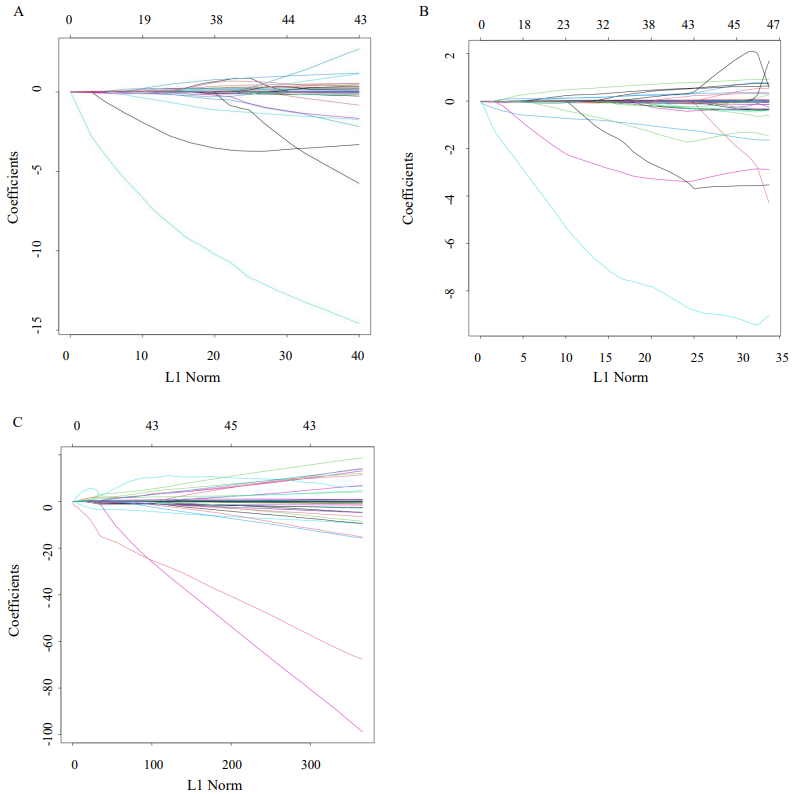


**Figure S2** LASSO feature selection models.

**Notes:** (A) LASSO coefficient profiles of all 53 features in the total study population. (B) LASSO coefficient profiles of all 53 features in the male patients. (C) LASSO coefficient profiles of all 53 features in the female patients.

**Abbreviation:** LASSO, least absolute shrinkage and selection operator.

A

B


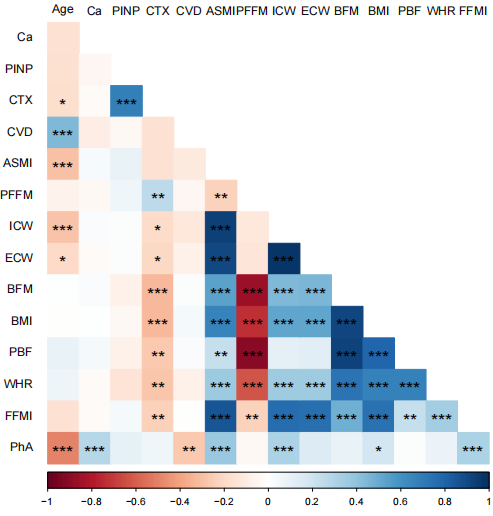

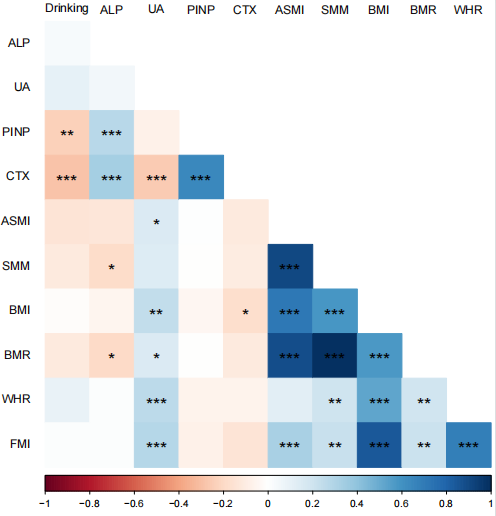


**Figure S3** The Spearman’s correlation analysis heat maps.

**Notes:** The Spearman’s correlation analysis heat map in the training datasets of male (A) and female patients (B).The colors of the squares in the heat map represent r values ranging from -1 to 1 according to the Spearman’s correlation analysis. * P < 0.05, ** P < 0.01, *** P < 0.001.

**Abbreviations:** ALP, alkaline phosphatase; UA, uric acid; PINP: N-terminal propeptide of type I procollagen; CTX:C-terminal telopeptide of type I collagen; ASMI, appendicular skeletal muscle mass index; SMM, skeletal muscle mass; BMI, body mass index; BMR, basal metabolic rate; WHR, waist-to-hip ratio; FMI, fat mass index; Ca, calcium; CVD, cardiovascular disease; PFFM, percentage of fat-free mass; ICW, intracellular water; ECW, extracellular water; BFM, body fat mass; PBF, percentage of body fat; FFMI, fat-free mass index; PhA, phase angle

**
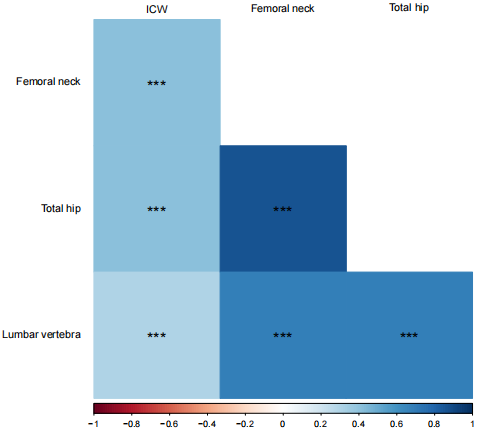
**

**Figure S4** The Spearman’s correlation analysis heat map illustrates the correlation between ICW and BMD at different measured sites in the female patients.

**Notes:** The colors of the squares in the heat map represent r values ranging from -1 to 1 according to the Spearman’s correlation analysis. *** P < 0.001.

**Abbreviations:** ICW, intracellular water; BMD, bone mineral density.


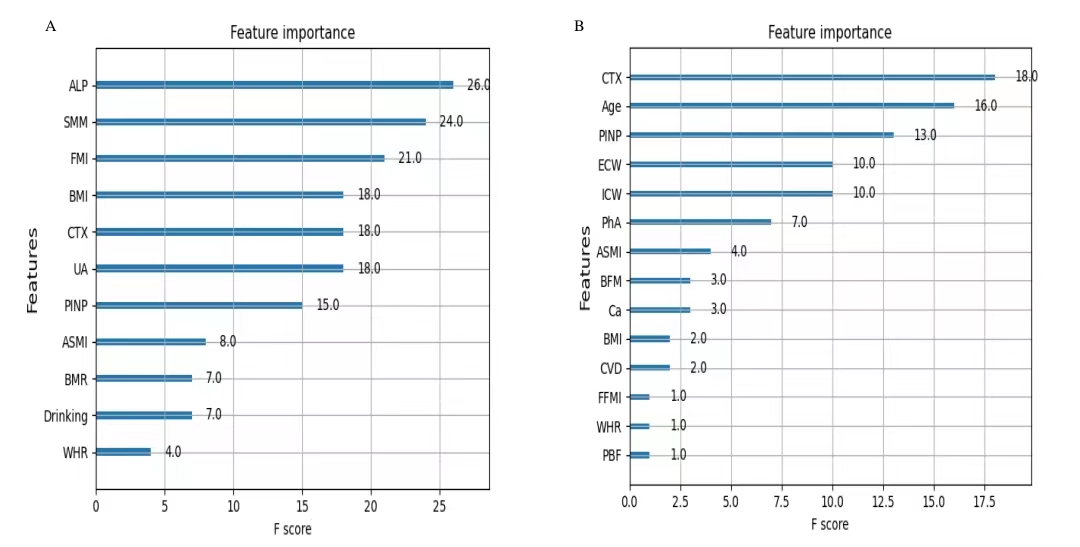


**Figure S5** The importance scores of the features by XGBoost algorithm.

**Notes:**The importance scores of the features are calculated by XGBoost in the male (A) and female patients (B).

**Abbreviations:** ALP, alkaline phosphatase; SMM, skeletal muscle mass; FMI, fat mass index; BMI, body mass index; CTX, C-terminal telopeptide of type I collagen; UA, uric acid; PINP, N-terminal propeptide of type I procollagen; ASMI, appendicular skeletal muscle mass index; BMR, basal metabolic rate; WHR, waist-to-hip ratio; ECW, extracellular water; ICW, intracellular water; PhA, phase angle; BFM, body fat mass; Ca, calcium; CVD, cardiovascular disease; FFMI, fat-free mass index; PBF, percentage of body fat.


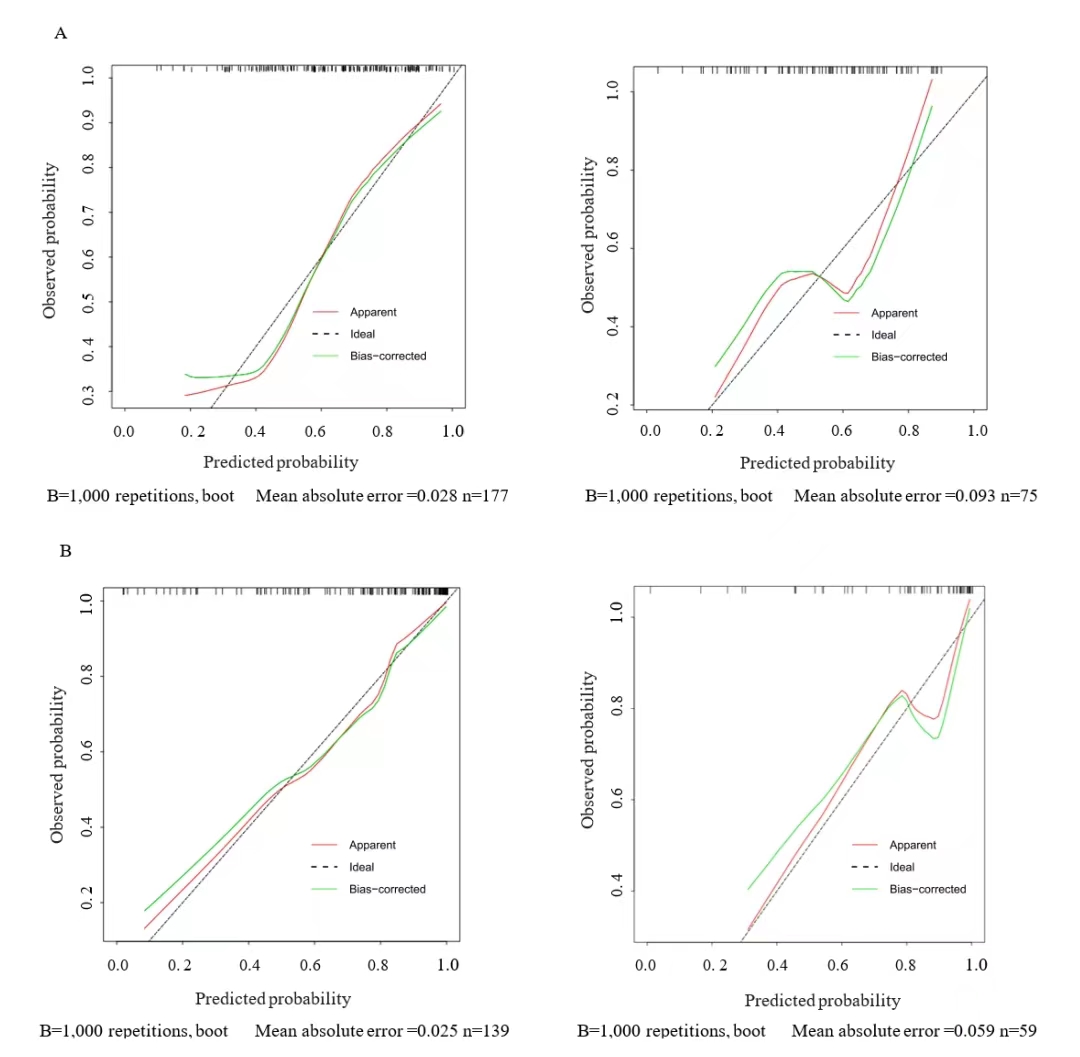


**Figure S6** Calibration curves of the nomogram.

**Notes:** Calibration curves of the nomogram in the male (A) and female patients (B) (left, training datasets, right, testing datasets).


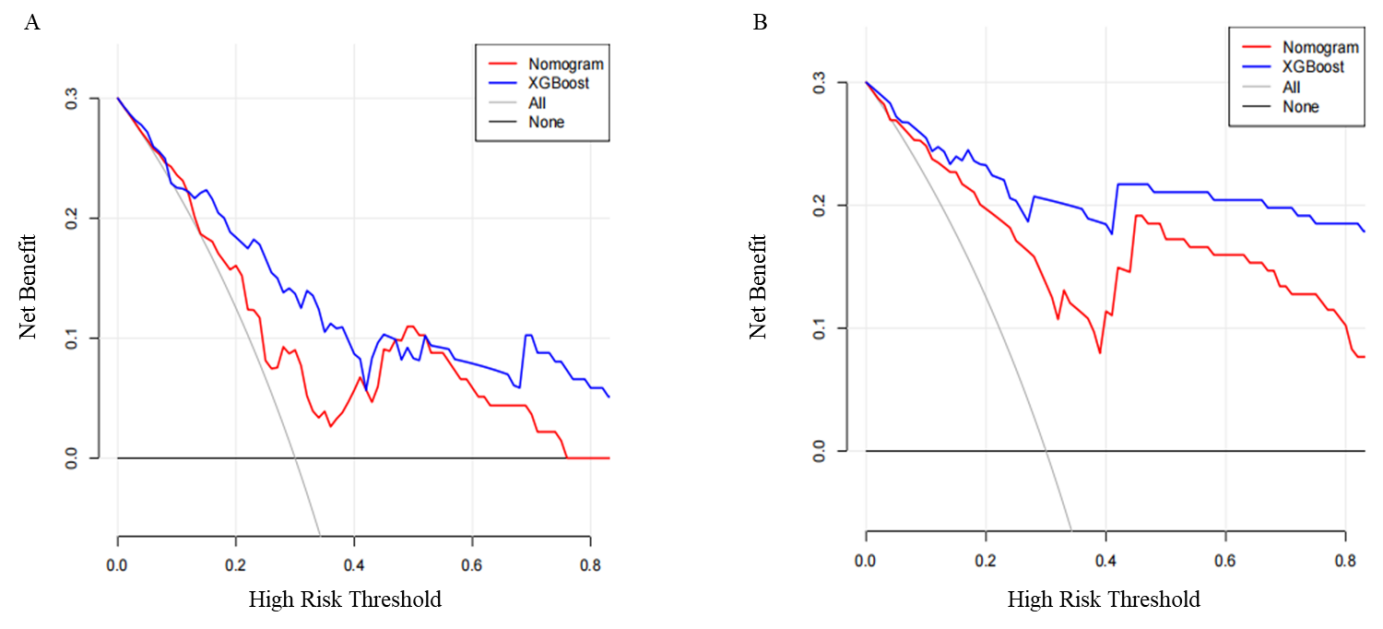
**Figure S7** Comparison of DCA.

**Notes:** Comparison of DCA between the nomogram and XGBoost models in the testing datasets of male (A) and female patients (B).

**Abbreviations:** DCA, decision curve analysis; XGBoost, extreme gradient boost.
